# Supplementary material for: A NEW FUZZY UNIT COMMITMENT MODEL AND SOLUTION
Source: MDPI journal article supplement (doi:10.3390/ijerph20054261), 2002-01-01
Supplement: s1 [file s1]

The hyperparameters tuned for the SVM classifier included the C value, gamma, and kernel, as follows:

- C values: {1, 2, 3, 4, 10, 12, 14, 18, 19, 20, 21, 22, 30}.
- Gamma values: {1, 0.1, 0.01, 0.001, 0.0001, "auto", "scale"}.
- Kernel values: {"rbf", "linear", "poly", "sigmoid"}.

The hyperparameters tuned for the DT classifier included the criterion, max\_depth, min\_samples\_leaf, and max\_leaf\_nodes, as follows:

- Criterion values: {"gini", "entropy", "log\_loss"}.
- Max\_depth values: {1, 2, 3, 4, 5, 6, 7, 8, 9, 10, 11, 12, None}.
- Min\_samples\_leaf ranged from 1 to 29.
- Max\_leaf\_nodes values: {1, 2, 3, 4, 5, 6, 8, 9, 10, 11, 12, 20, 22, 24, 25, 28, 30}.

The hyperparameters tuned for the LR classifier included the penalty, class\_weight, and C value.

- Penalty values: {"l1", "l2", "elasticnet", "none"}.
- Class\_weight values: {"dict", "balanced", None}.
- C values: {1, 0.5, 0.01, 0.001, 2, 3, 4, 5, 6, 7, 8, 9, 10}.

The hyperparameters tuned for the RF classifier included the max\_depth, n\_estimators, criterion, max\_leaf\_nodes, and min\_samples\_leaf.

- Max\_depth values: {2, 4, 6, 8, 10, 12, 14, 16, 20, 25, 30, None}.
- N\_estimators ranged from 100 to 350, with 50 steps in each iteration.
- Criterion values: {"gini", "entropy", "log\_loss"}.
- Max\_leaf\_nodes values: {2, 4, 6, 8, 10, 12, 14, 16, None}.
- Min\_samples\_leaf values ranged from 1 to 10.

The hyperparameters tuned for the XGBoost classifier included the n\_estimators, learning\_rate, booster, and gamma.

- N\_estimators ranged from 50 to 290, with 10 steps in each iteration.
- Learning\_rate values: {0.01, 0.05, 0.1, 0.2, 0.4, 0.5, 1}.
- Booster values: {"gbtree", "gblinear", "dart"}.
- Gamma values: {0, 0.5, 1, 0.3, 0.4, 0.5, 1, 2, 3}.

The hyperparameters tuned for the Adaboost classifier included the n\_estimators, learning\_rate, and algorithm.

- N\_estimators ranged from 50 to 390, with 10 steps in each iteration.
- Learning\_rate values: {0.0001, 0.001, 0.01, 0.1, 0.2, 0.3, 0.5, 1, 2, 3}.
- Algorithm values: {"SAMME", "SAMME.R"}.

The hyperparameters tuned for the ET classifier included the `n_estimators`, `max_depth`, `max_leaf_nodes`, and `min_samples_leaf`.

- `N_estimators` values ranged from 50 to 550, with 50 steps in each iteration.
- `Max_depth` values: {1, 2, 3, 4, 5, 6, 7, 8, 9, 10, 12, 13, 14, 16}.
- `Max_leaf_nodes` values: {2, 4, 6, 8, 10, 12, 14, 16, None}.
- `Min_samples_leaf` values ranged from 1 to 10.
